# Supplementary material
Source: PubMed Central journal article supplement (PMC3665360)
Supplement: NIHMS468642-supplement-1_si_001.pdf [file NIHMS468642-supplement-1_si_001.pdf]

## Supporting Information for:

### *A single-molecule view of the assembly pathway, subunit stoichiometry and unwinding activity of the bacteriophage T4 primosome (helicase-primase) complex*

Wonbae Lee,<sup>1,2</sup> Davis Jose,<sup>2</sup> Carey Phelps,<sup>1,2</sup> Andrew H. Marcus<sup>1,2,\*</sup> and Peter H. von Hippel<sup>2,\*</sup>

<sup>1</sup> Oregon Center for Optics and Department of Chemistry, University of Oregon, Eugene, OR 97403

<sup>2</sup> Institute of Molecular Biology and Department of Chemistry, University of Oregon, Eugene, OR 97403

\* Corresponding authors: [petevh@molbio.uoregon.edu](mailto:petevh@molbio.uoregon.edu), [ahmarcus@uoregon.edu](mailto:ahmarcus@uoregon.edu)

**Table S1. Nomenclature and sequences for the DNA constructs used in this study.**

| Construct                | DNA Sequence                                                                                                                                       |
|--------------------------|----------------------------------------------------------------------------------------------------------------------------------------------------|
| smFRET experiment        | 5'-Biotin-CAGTCATAATATGCGAiCy5GCGATTATATATGCTTTTACCACCTTCACTCAGTGCTTAC-3'<br>     <br>3'-GTCAGTATTATACGCTiCy3CGCTAATATACCACG (T) <sub>29</sub> -5' |
| Helicase unwinding assay | 5'-CAGTCATAATATGCGAGCGATTATATATGCTTTTACCACCTTCACTCAGTGCTTAC-3'<br>     <br>3'-GTCAGTATTATACGCTCGCTAATATACCACG (T) <sub>29</sub> -5'                |
| ATPase assay             | 5'-dT <sub>22</sub> -dG-dT <sub>22</sub> -3'                                                                                                       |

- iCy3 and iCy5 refer to internally labeled Cy3 and Cy5 donor-acceptor chromophores.

*Bulk unwinding assays to determine the effect on the apparent unwinding activity of the T4 primosome helicase of the incorporation of iCy3 / iCy5 fluorophores*

*into the backbones of the DNA fork assay substrates.* We carried out unwinding experiments with unlabeled and iCy3 / iCy5 backbone-labeled DNA constructs to determine the effect of the presence of the iCy3 / iCy5 chromophore complex on the activity of the T4 primosome helicase. The lagging (5'→ 3') strand was labeled with  $\gamma^{32}\text{P}$  at the 5'-end and was annealed to the leading strand. The DNA fork substrates (5 nM) were added to a reaction buffer containing 33 mM Tris-OAc (pH 7.8), 150 mM KOAc, and 6 mM  $\text{Mg}(\text{OAc})_2$  in addition to 3.5 mM ATP. The reaction was initiated by the sequential addition of T4 gp41 and gp61 (300 nM and 50 nM, respectively). 5  $\mu\text{L}$  were taken at the indicated intervals. The 5  $\mu\text{L}$  time points were quenched with an equal volume of a stop solution containing 1 mg/ml proteinase k, 0.2% SDS, 20 mM Tris-OAc (pH 7.5) and 2 mM  $\text{Ca}(\text{OAc})_2$ . The quenched reactions were then incubated at 45°C for 5 minutes, after which 6  $\mu\text{L}$  of native gel loading dye was added to the samples. The samples were then subjected to non-denaturing gel electrophoresis on 10% polyacrylamide TBE gels (19:1 acrylamide / bis) at 20 mA constant current for 1.5 hours.

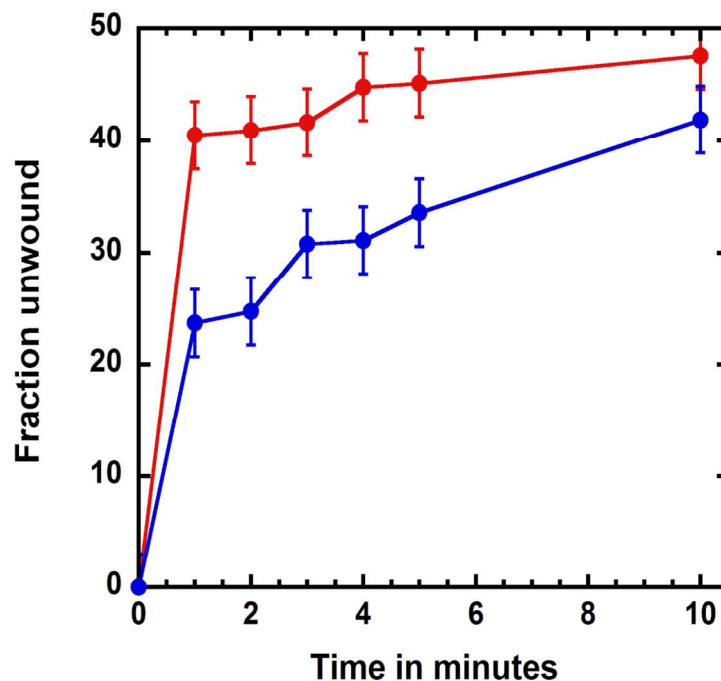

**Figure S1. Bulk helicase unwinding assays catalyzed by the T4 primosome helicase using either unlabeled or iCy3 / iCy5-labeled DNA fork constructs.** Helicase unwinding assay with DNA fork constructs containing no iCy3 / iCy5 (red circles)

and with iCy3 / iCy5 chromophores incorporated into the DNA backbones of the constructs (blue circles). The DNA constructs used are shown in Table S1.

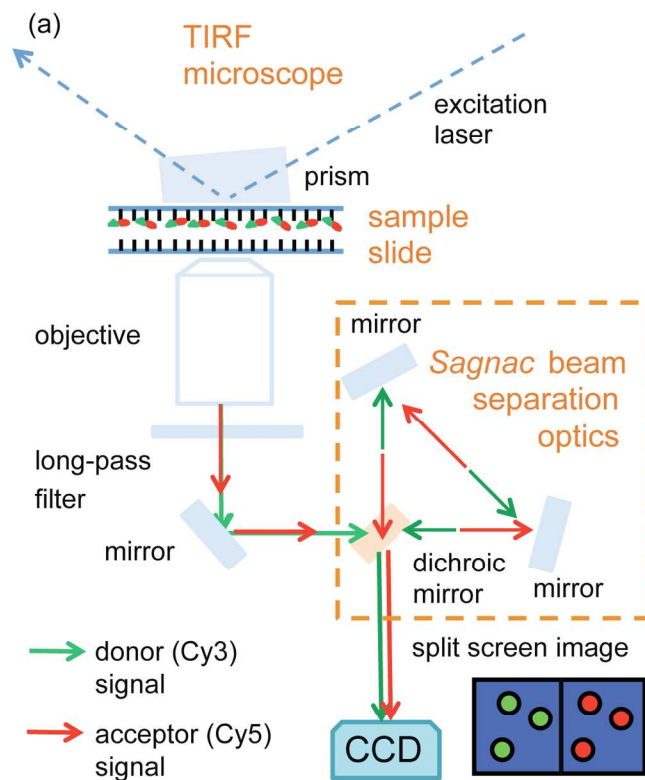

**Figure S2. Schematic diagram of the single molecule (SM)-FRET instrument used in these studies.** (a) Molecules tethered to the quartz slide sample surface via biotin-neutravidin linkages were monitored using a prism-based total internal reflection

fluorescence (TIRF) microscope. Donor and acceptor fluorescence were collected using a microscope objective and directed through a long-pass filter. The paths of the donor and acceptor fluorescence were separated using a *Sagnac* interferometer, and their images were projected side-by-side onto the active area of an electron-multiplied charge-coupled-device camera (EMCCD). (b) Photographic detail of the *Sagnac* interferometer. The fluorescence image was directed onto a dichroic mirror, which was placed at the input beam-splitter position of the interferometer. We used broadband dielectric mirrors ( $R_{\text{effectivity, avg.}} > 99\%$ , 400 – 750 nm).

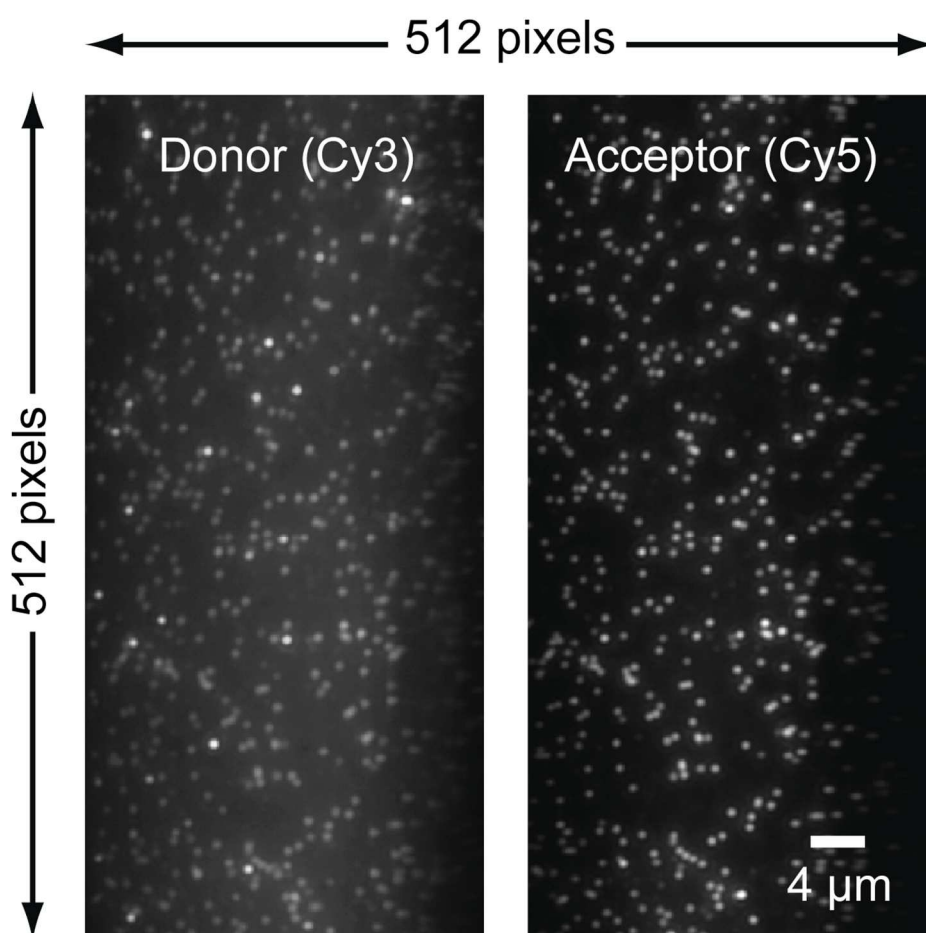

**Figure S3. Representative single molecule images obtained with our instrument.** The image is split into donor (left side) and acceptor (right side) channels, each  $30 \times 60 \mu\text{m}^2$ . The images of a donor molecule and its paired acceptor are spatially separated on the camera by 255 pixels.

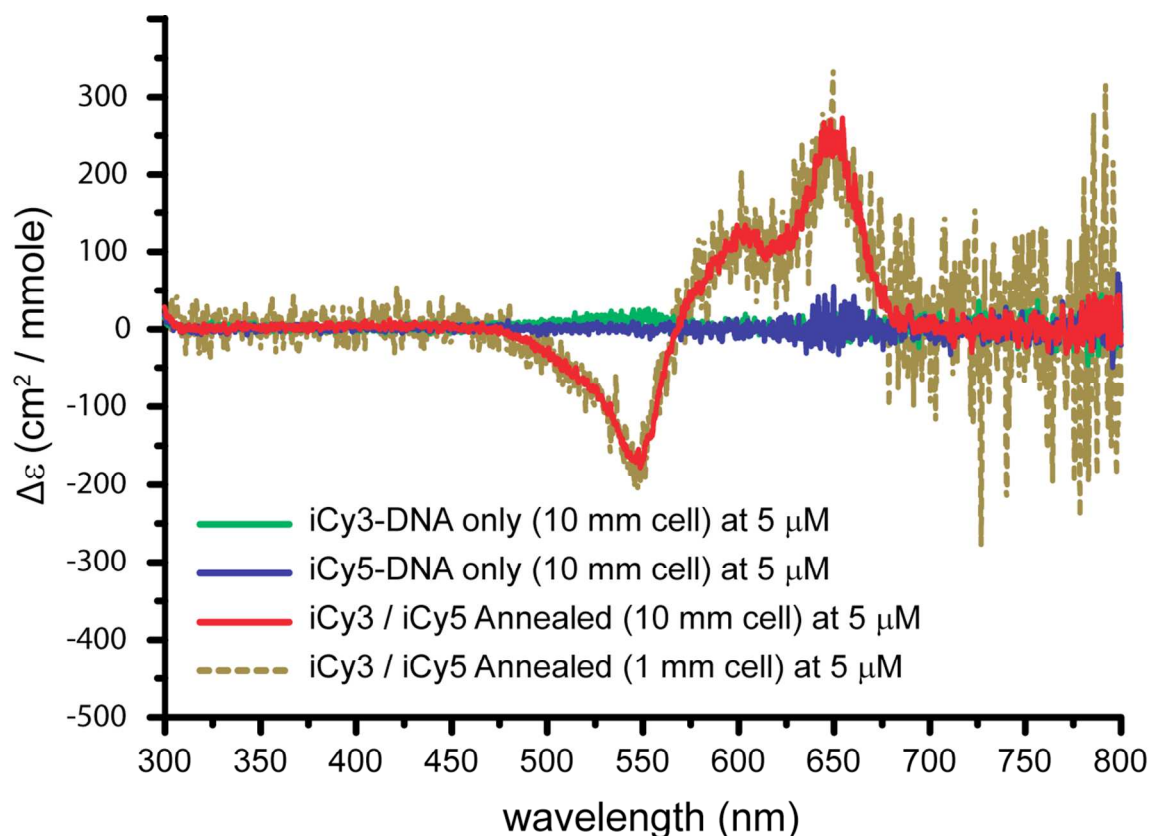

**Figure S4.** CD spectra at  $\lambda > 300$  nm of the fully annealed dsDNA replication fork constructs and the constituent ssDNA strands with and without the iCy3 / iCy5 chromophores of the internally labeled FRET complex. The concentrations of the DNA construct molecules were 5  $\mu$ M, and the measurements were made at room temperature and in standard imaging buffer (10 mM Tris at pH 8.0, 100 mM NaCl, and 6 mM MgCl<sub>2</sub>). CD spectra were measured between  $\lambda = 300$  and 800 nm on a Jasco model J-720 CD spectrometer. We note that the strong CD signal over the 475 to 680 nm wavelength range (red curve) indicates that the iCy3 / iCy5 chromophores are rigidly positioned within the duplex sugar-phosphate backbone. This chiral CD signal is not present in the CD spectra of the separated iCy3 and iCy5-labeled ssDNA strands (green and blue curves, respectively). We include both the 1 mm and the 10 mm cell scans of the annealed duplex to show that, while the 1 mm scan data are very noisy, the 1 and 10 mm cell scans are the same, thus demonstrating that the significant features of the CD scan of the duplex are independent of cell length.
